# Supplementary material for: To new heights by flying low: Comparison of aircraft vertical NO 2 profiles to model simulations and implications for TROPOMI NO 2 retrievals
Source: Copernicus journal article supplement (doi:10.5194/egusphere-2023-1059), 2023-06-05
Supplement: Supplementary file 1 [file egusphere-2023-1059-supplement.zip]

## S1 General weather and chemical conditions

Figure S1 shows the flight paths for the 10 profiles and 3 horizontal scans overlayed over the coinciding TROPOMI NO<sub>2</sub> columns. Fig. S2 shows the measured and modeled potential Temperature profiles for the 10 vertical profiles.

Below we summarize the general weather conditions relevant for interpreting the aircraft data during the four flight days.

2 June: Moderate winds from the east/southeast, over the North Sea around 10 m/s, wind gusts similar, and mostly cloud free. Warm weather, temperatures over the Netherlands >25°C. Air pollution from the Randstad is blown onto the southern North Sea with a east-southeast to west-north-west orientation.

22/23 July: Light, mostly northerly winds mostly, with wind speeds of 3-7 m/s, wind gusts similar, mostly cloud free with some shallow cumulus and stratocumulus clouds over the North Sea. Pleasant weather, maximum temperatures over the Netherlands 20°-25°C. Chemical conditions are clean and northerly flow causes air pollution from the Netherlands to be blown away from the North Sea with a east-southeast to west-north-west orientation.

8 September: Light to moderate winds east/southeasterly, wind speeds 5-10 m/s, wind gusts similar. Nearly cloud free warm weather, maximum temperatures over the Netherlands >25°C. Air pollution from the Randstad is advected onto the southern North Sea.

9 September: Light to moderate winds from the south, wind speeds 5-10 m/s, wind gusts similar. Scattered low clouds and some stratocumulus fields, indicative of increasing atmospheric instability. Warm weather, maximum temperatures over the Netherlands >25°C. Air pollution from the southwestern Netherlands is blown onto the southern North Sea with a north-south orientation. The Southernmost North Sea is relatively clean with a southwesterly flow.

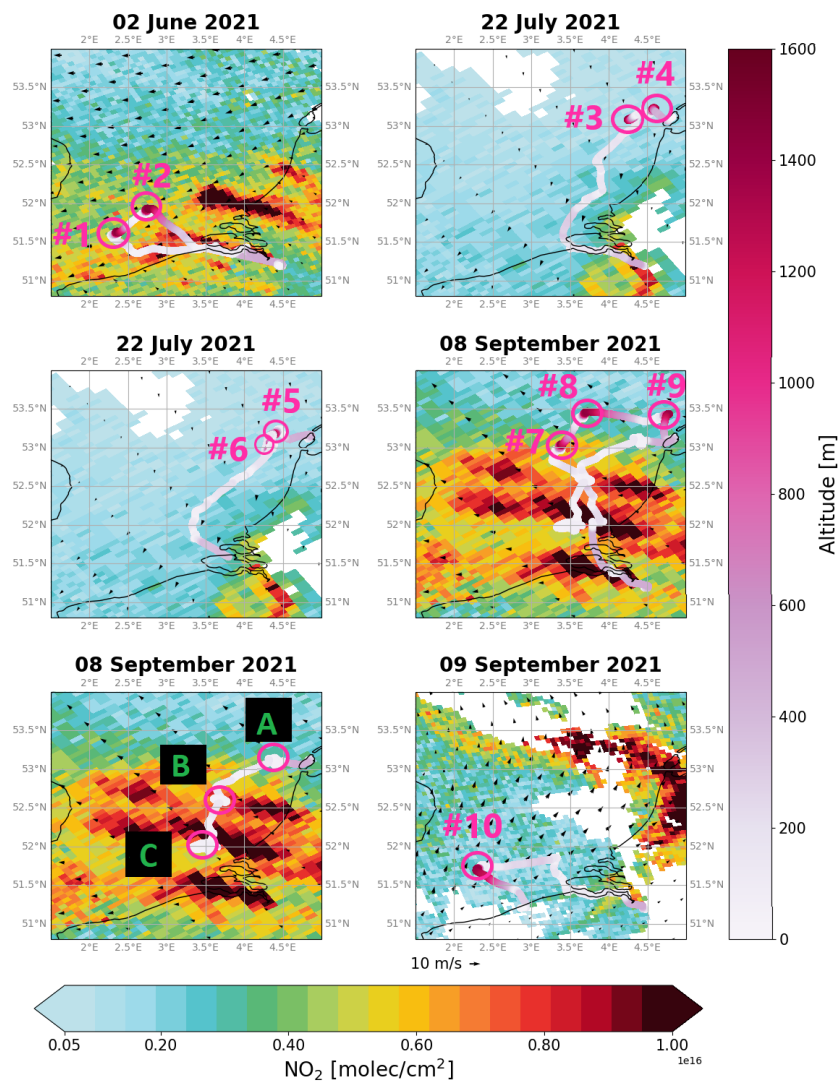

S 1: Overview of flight paths for ten vertical profiles (1-10) and three horizontal scans (A-C). Shown are the NO<sub>2</sub> column densities over the North Sea measured by TROPOMI at time of flight and the route of the aircraft as well as ECMWF 10 m wind indicated by the arrows.

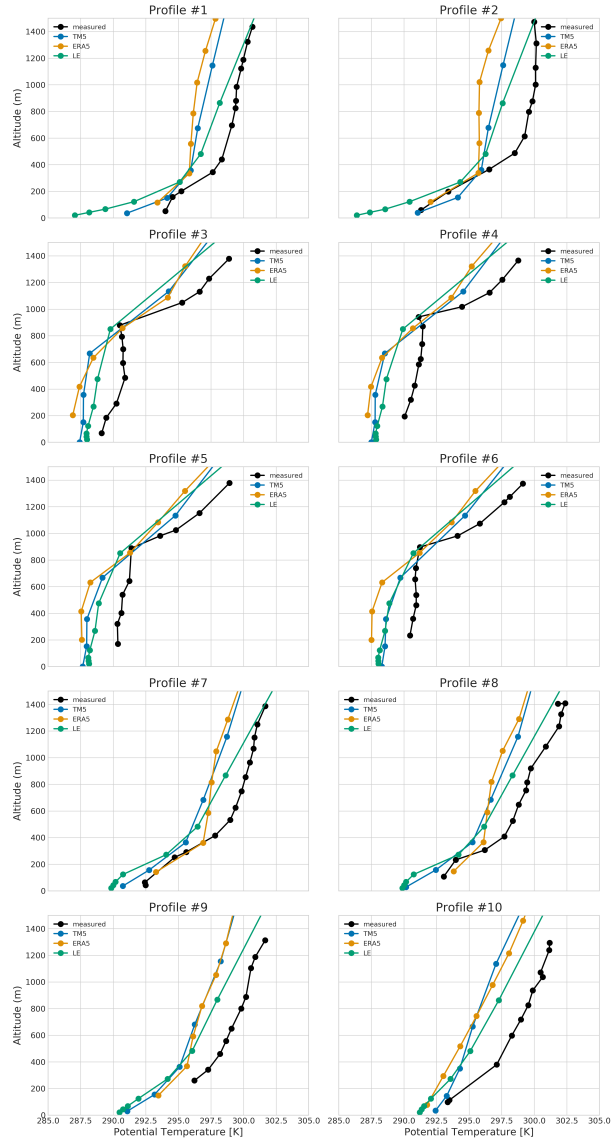

S 2: Profiles of potential temperature of all flights as well as coinciding, TM5, CAMS ensemble mean and LE 2x2 km profiles.

## 24 S2 PARANOX

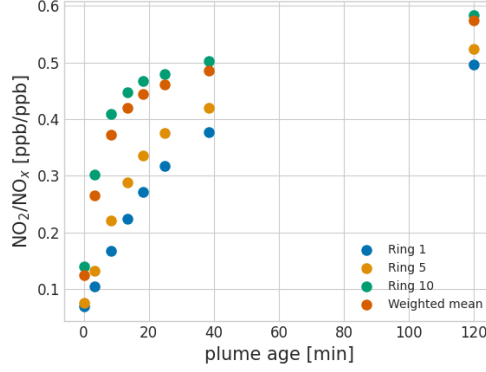

S 3: Relationship  $\text{NO}_2/\text{NO}_x$  ratio to binned plume age for PARANOX modeled plume for conditions during profile flight 1.

25 The PARANOX (PARAmetrization of Aircraft emitted NOX) model is a Gaussian plume model  
 26 based on work from [Vila-Guerau de Arellano et al., 1990] which was successfully used for the pa-  
 27 rameterization of aircraft emissions and later for ship emissions [Vinken et al., 2011]. PARANOX  
 28 simulates the dispersion of a plume in 10 concentric elliptical rings and the chemical evolution of the  
 29 concentrations of several atmospheric trace gases inside it.  
 30 In this study we use the weighted average  $\text{NO}_2/\text{NO}_x$  ratio of the simulated aging plumes for neutral  
 31 stability. For each of the 10 profiles a separate simulation was performed, using coinciding wind  
 32 speeds from ERA5 reanalysis data, and background  $\text{NO}_x$  and  $\text{O}_3$  values from the CAMS ensemble  
 33 mean. For all simulations, the  $\text{NO}_x$  emission strength was set at 60 g/s with 94% of the  $\text{NO}_x$  emitted  
 34 as NO in line with [Eyring et al., 2005]. Fig. S3 shows the simulated  $\text{NO}_2/\text{NO}_x$  ratio for profile 1.

### S3 Spatial representativeness of profile flights and other corrections

| Profile number | MUMM flight | date       | Post-hoc NO2 calibration [ppb] |
|----------------|-------------|------------|--------------------------------|
| #1             | 21082       | 02.06.2021 | 3.28                           |
| #2             | 21082       | 02.06.2021 | 4.44                           |
| #3             | 21116       | 22.07.2021 | -0.04                          |
| #4             | 21116       | 22.07.2021 | -0.02                          |
| #5             | 21117       | 22.07.2021 | -0.80                          |
| #6             | 21117       | 22.07.2021 | 0.02                           |
| #7             | 21133       | 08.09.2021 | -3.96                          |
| #8             | 21133       | 08.09.2021 | -3.28                          |
| #9             | 21133       | 08.09.2021 | -3.60                          |
| #10            | 21135       | 09.09.2021 | -2.68                          |

1. **Calibration.** We apply a post-hoc calibration of NO<sub>2</sub> mixing ratio  $C$  to fit the CAMS ensemble mean in the clean troposphere (above 250 m). The corrected volume mixing ratio  $C'_{mumm}$  is the sum of the measured mixing ratio  $C_{meas}$  and the post-hoc calibration  $b$ :  $C'_{mumm} = C_{meas} + b$  with  $b$  such that  $\overline{X(C_{meas} + b)}_{>250m} = \overline{X(C_{CAMS})}_{>250m}$  where  $X$  is the mass density. The table above shows our post-hoc calibration values  $b$  for every flight. The biases are largely consistent during each day, consistent with the daily calibration routine executed prior to flight. Given the spread of calibrations during individual days, we assume a uncertainty of the bias correction of 0.5 ppb (mean of standard deviations for days 02.06., 22.07., 08.09.)).

2. **In-plume bias.** We expect any given area (e.g. a TROPOMI pixel) to be covered partially by a plume and partially by NO<sub>2</sub> background values. The coastguard flights actively approached ships and their plumes (see Sect. 2.2 in the main text) in order to measure the composition of the exhaust. Our measurements are therefore not necessarily representative of the mean concentrations over the entire area. Therefore, we use the representative random sampling of the transect flights to calculate an expected fraction of time in the plume for the lowest part of each profile (if it would have been a random sampling) and correct the observed measurements to fit this.

To tackle this, we use 20-sec interpolated AIS ship location and the wind speed measured by the aircraft to calculate plume locations. We define an area of interest (AOI) which spans a rectangle from the minimal to maximal longitude/latitude. We use plume locations based on the AIS information on ship position and speed for all ships sailing within a distance of 0.5° margin on both latitude and longitude within 2 hours before the end of an aircraft profile. We use the mean wind direction and wind speed measured by the aircraft below 100 m to predict the presence of the plumes from any ship within the vicinity. We apply the projection method that was introduced by [Georgoulas et al., 2020]: the location of a plume at time  $t$  is simply the projected ship location from time  $t_0$  multiplied with the wind speed in the direction of the wind:  $x_{new} = x_{AIS} + u \cdot (t - t_0)$ . We then count the number  $N$  of expected 20-second plume locations in the AOI and divide it by the size of the AOI  $A$  to calculate a so-called in-plume fraction  $f_{AOI} = N_{AOI}/A_{AOI}$ .

Taking the three transect flights (where the whole horizontal plane was sampled and therefore have a representative image of the area), we look at the  $\text{NO}_x$  measurements and define a measurement to be ‘in plume’ if the mixing ratio is at least 8 ppb above a background given by the 25 percentile of all  $\text{NO}_x$  measurements in said transects. Similar values for the threshold have been tested and yield similar results. From that we calculate the fraction of in plume measurements  $r$  as:  $r_{AOI} = \frac{N_{inplume}}{N_{total}}$ . Next, we assume a linear relationship between  $f$  and  $r$  and perform a linear fit through the three transect flights, yielding  $r = c_1 * f + c_0$ . This is our in-plume bias correction fit.

Using  $c_0$  and  $c_1$  from this fit, we calculate the expected  $r_{exp}$  for the lowest 100 m of each profile based on  $f_{AOI}$ . Additionally, we calculate the actual  $r_{actual}$  from the measured data. To correct each profile with the in-plume bias correction fit obtained from the transects we then calculate corrected mixing ratios  $C''_{mumm,inplume} = C'_{mumm,inplume} * \frac{r_{exp}}{r_{actual}}$  for in-plume measurements and  $C''_{mumm,noplume} = C'_{mumm,noplume} * \frac{1-r_{exp}}{1-r_{actual}}$  for measurements out of the plume. Since the linear fit is based on three data points only, we assume an uncertainty of 20% on  $r_{exp}$ .

To test the reliability, we additionally use a Monte Carlo simulation to calculate the  $\text{NO}_2$  concentration in the lowest 50 m. Here, we first calculate the expected ratio of in/out of plume measurements  $r_{exp}$  as above and then draw random values of in/out of plume measurements of all profile flights, using the same in/out of plume definition as above. For every profile, we run 100 such simulations, using 20 measurements each (of which  $20 * r_{exp}$  are drawn from the ‘in plume’ pool). The 100 results give a range of expected values for the lowest 50 m and are largely in line with the first approach. The Monte Carlo approach gives a more multi-flight representation of the in- and out-of-plume measurements and might thus overestimate or underestimate  $\text{NO}_2$  concentrations in plumes of weak or strong emitting ships, respectively.

**3.  $\text{NO}_2/\text{NO}_x$  ratio correction.** The  $\text{NO}_2$  values are not directly measured but taken from the difference between  $\text{NO}_x$  and  $\text{NO}$ . If the two are not measured completely simultaneously but slightly shifted, a (strong) gradient in  $\text{NO}_x$  concentrations will lead to strongly negative  $\text{NO}_2$  if the aircraft is measuring  $\text{NO}$  while in the plume, and  $\text{NO}_x$  when outside the plume. Similarly, when  $\text{NO}_x$  is measured in-plume and  $\text{NO}$  out-of-plume, the  $\text{NO}_2$  values will be overestimated in respect to the measurement interval. To avoid such extreme  $\text{NO}_2$  values, we run the Gaussian plume model PARANOX (see Supplemente S2) with  $\text{NO}_x$  and  $\text{O}_3$  background levels similar to those during measurements. The modeled  $\text{NO}_2/\text{NO}_x$  ratios for rings 1 (center of plume), 5, 10 (edge of plume) and a volume weighted average for conditions during profile 1 are shown in Fig. S3.

All  $\text{NO}_2$  measurements in-plume with negative  $\text{NO}_2$  or  $\text{NO}_2/\text{NO}_x$  ratios above 0.8 are then corrected to fit the weighted modeled ratio according to the plumes age. We assume an uncertainty for the modeled  $\text{NO}_2/\text{NO}_x$  ratio of 0.1.

Fig. S4 shows the uncorrected and corrected profiles including the uncertainty estimate for the corrected data as well as the Monte Carlo simulations for the lowest level. Generally, the calibration bias dominates as can be seen from the offset between the gray and black bold lines. Below 150 m, the other corrections come into play, making the surface pollution more or less pronounced.

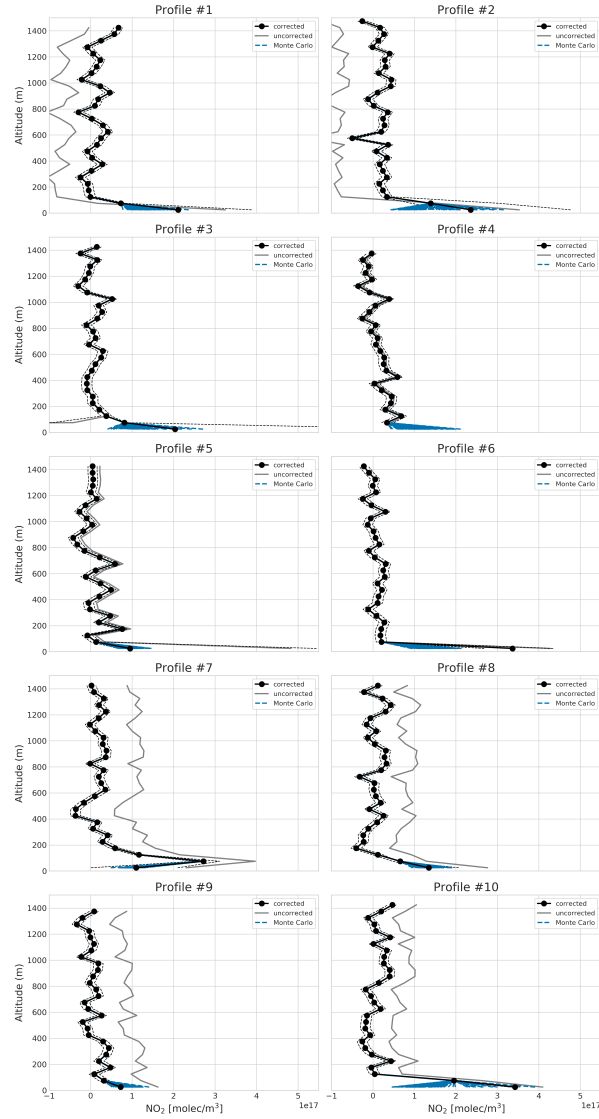

S 4: Aircraft measured profiles. The bold gray line shows the raw measured data, the bold black line the corrected profile, the dashed black lines the uncertainty estimate and the blue lines show the Monte Carlo simulation for the lowest 50 m.

## 109 S4 Additional NO<sub>2</sub> maps

110 Fig. S5 shows the TROPOMI and modeled NO<sub>2</sub> column during the profile flights not presented in the main manuscript as well as the flight path and aircraft NO<sub>2</sub> measurements below 200 m.

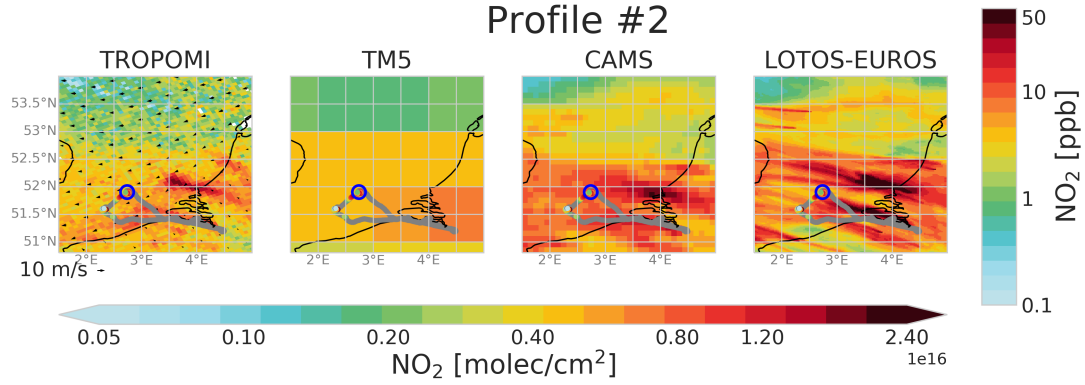

S 5: NO<sub>2</sub> columns as seen by TROPOMI and several model products for the time of the second profile measurement as indicated by the bottom colorbar. Overlaid are the aircraft measurements in grey for flights above 200 m and in colors below as indicated by the colorbar on the right as well as wind speed and direction by the arrows in the left panel.

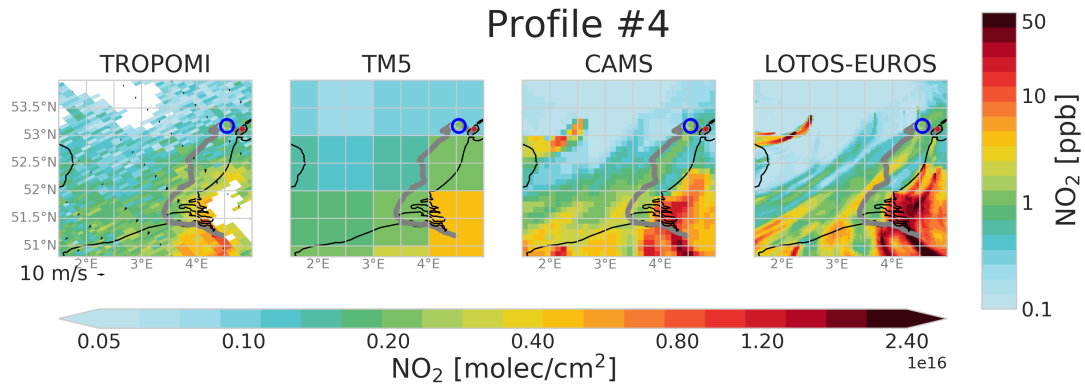



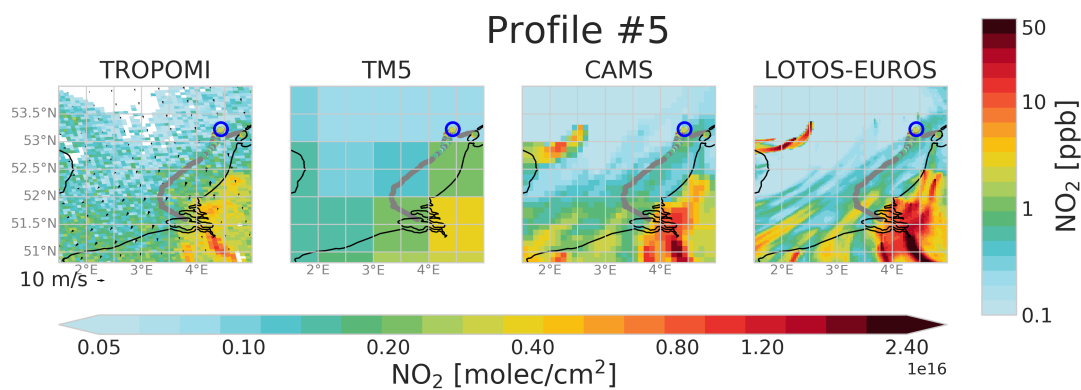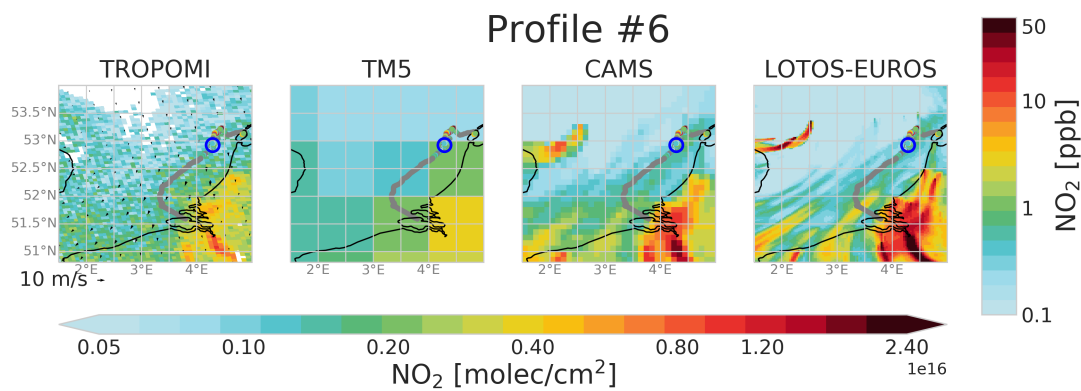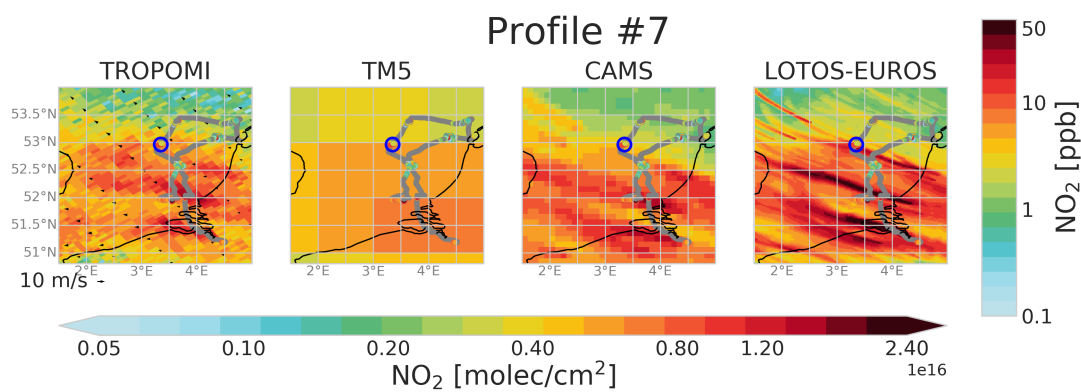

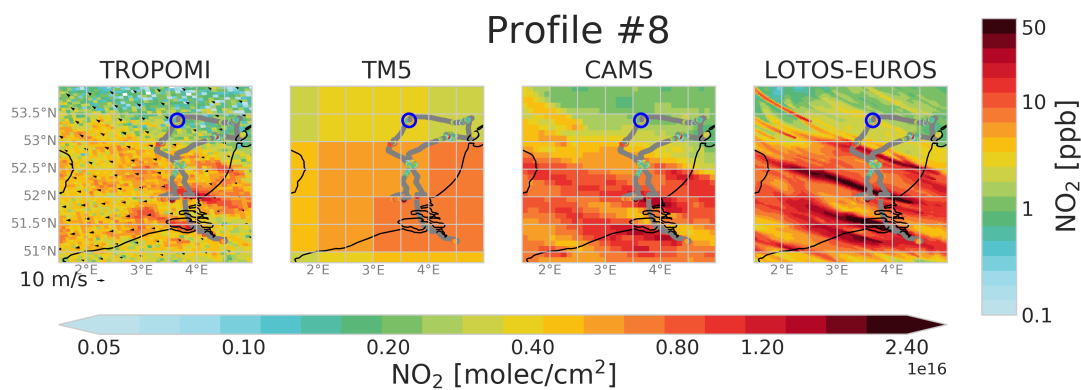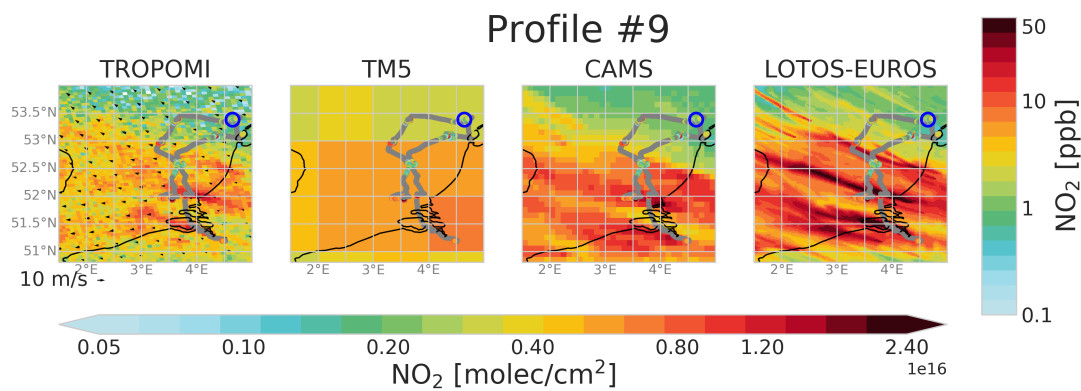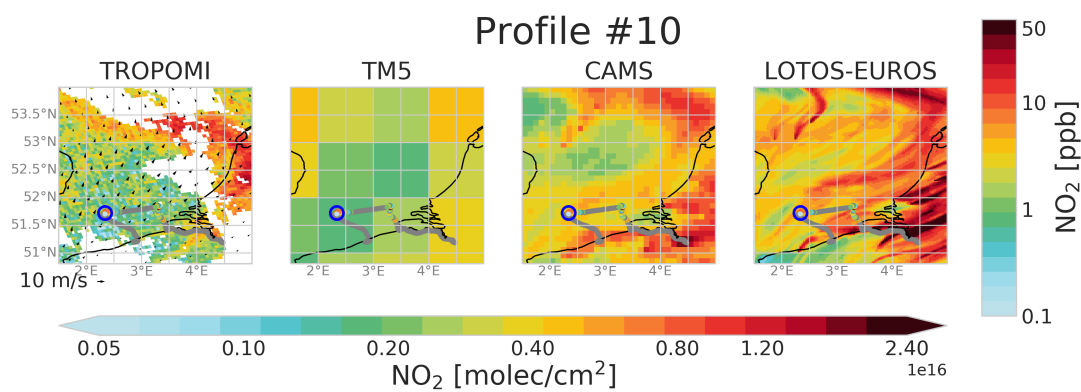

112 **S5 CO<sub>2</sub> profiles**

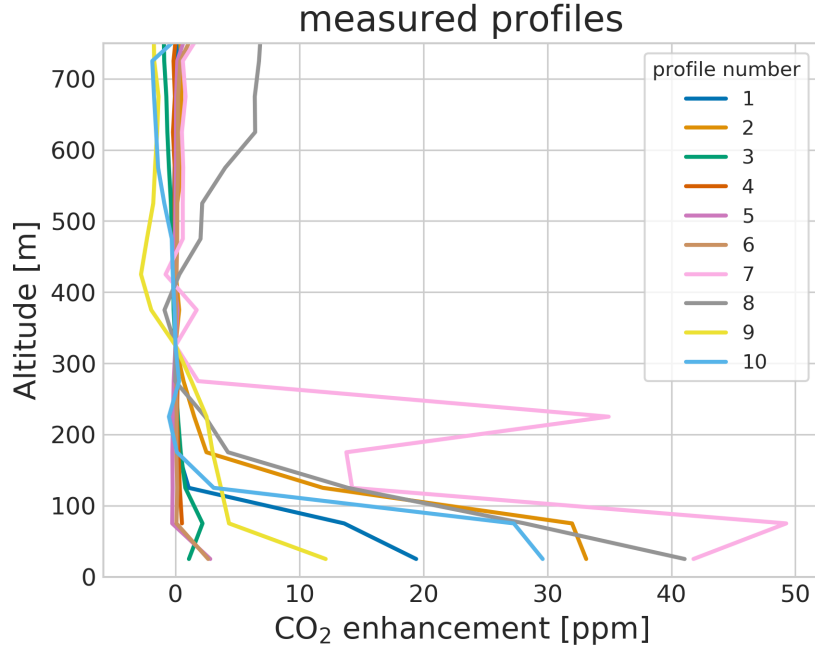

S 6: CO<sub>2</sub> enhancement profiles for the ten spiral flights. As the CO<sub>2</sub> sensor was not calibrated, the 300-350 m value is subtracted to visualize the enhancement in the mixed layer.

113 Fig. S6 shows the CO<sub>2</sub> enhancements in the mixed layers measured for the ten profiles. The  
 114 observed mixing layer height of  $\sim 150$ m agrees well with the observations in the NO<sub>2</sub> profiles. The  
 115 CO<sub>2</sub> concentrations are measured directly with a temporal resolution of 1 Hz and no corrections are  
 116 applied here.

## 117 S6 Sea-land contrast

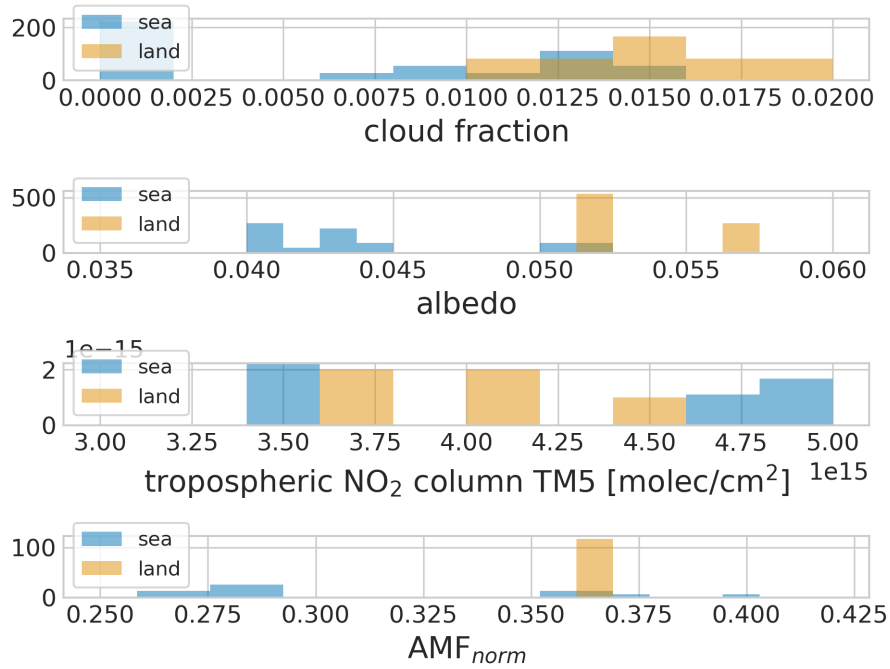

S 7: Normalized distributions of cloud fraction, surface albedo, TM5 a priori columns and normalized tropospheric AMF over land (yellow) and sea (blue).

118 We compare tropospheric AMFs over sea at the time and location of the aircraft measurements to  
 119 AMFs over land at the Cabauw tower in the same TROPOMI orbits. For this analysis, we normalize  
 120 tropospheric AMFs for viewing and solar geometry by dividing the topospheric AMFs provided in  
 121 the TROPOMI files by the geometric AMFs. To make sure the observed differences are caused by the  
 122 differences in surface properties, we include only scenes with similar a priori columns and cloudiness  
 123 levels. Fig. S7 shows the distribution of cloud fractions, albedo, a priori columns and AMFs for the  
 124 land and sea scenes. We find on average 20% lower tropospheric AMFs over the North Sea compared  
 125 to land given similar overall retrieval conditions.

126

## References

- [Eyring et al., 2005] Eyring, V., Köhler, H. W., Lauer, A., and Lempert, B. (2005). Emissions from international shipping: 2. Impact of future technologies on scenarios until 2050. *Journal of Geophysical Research D: Atmospheres*, 110(17):183–200.
- [Georgoulias et al., 2020] Georgoulias, A. K., Boersma, K. F., Van Vliet, J., Zhang, X., Van Der A, R., Zanis, P., and De Laat, J. (2020). Detection of NO<sub>2</sub> pollution plumes from individual ships with the TROPOMI/S5P satellite sensor. *Environmental Research Letters*, 15(12):124037.
- [Vila-Guerau de Arellano et al., 1990] Vila-Guerau de Arellano, J., Talmon, A., Part, P. B. A. E., and 1990, u. (1990). A chemically reactive plume model for the NO-NO<sub>2</sub>-O<sub>3</sub> system. *Atmospheric Environment*, 24A(8):2237–2246.
- [Vinken et al., 2011] Vinken, G. C., Boersma, K. F., Jacob, D. J., and Meijer, E. W. (2011). Accounting for non-linear chemistry of ship plumes in the GEOS-Chem global chemistry transport model. *Atmospheric Chemistry and Physics*, 11(22):11707–11722.
